# Supplementary material for: Chemical bonding and dynamic structural fluxionality of a boron-based Al2B8 binary cluster: the robustness of a doubly 6π/6σ aromatic [B8]2− molecular wheel
Source: Royal Society of Chemistry journal article supplement (doi:10.1039/d2ra07268h), 2023-01-01

## SUPPLEMENTARY INFORMATION

### Chemical bonding and dynamic structural fluxionality of a boron-based $\text{Al}_2\text{B}_8$ binary cluster: The robustness of a doubly $6\pi/6\sigma$ aromatic $[\text{B}_8]^{2-}$ molecular wheel

Rong-Xin Yue,<sup>a</sup> Shu-Juan Gao,<sup>a,b</sup> Peng-Fei Han,<sup>a</sup> and Hua-Jin Zhai<sup>\*a</sup>

<sup>a</sup>*Nanocluster Laboratory, Institute of Molecular Science, Shanxi University, Taiyuan 030006, China*

<sup>b</sup>*Department of Chemistry and Chemical Engineering, Lvliang University, Lvliang 033000, China*

\*E-mail: hj.zhai@sxu.edu.cn

### Supplementary Information – Part I

- Table S1.** Cartesian coordinates for optimized global-minimum (GM) and transition-state (TS) structures of  $\text{Al}_2\text{B}_8$  cluster at the PBE0/6-311+G(d) level.
- Table S2.** Orbital composition analysis for occupied canonical molecular orbitals (CMOs) of GM  $C_{2v}$  ( $^1A_1$ )  $\text{Al}_2\text{B}_8$  cluster. Main components are highlighted in **bold**.
- Table S3.** Orbital composition analysis for occupied CMOs of TS  $\text{Al}_2\text{B}_8$  cluster. Main components are highlighted in **bold**.
- Figure S1.** Alternative optimized structures for  $\text{Al}_2\text{B}_8$  cluster at the PBE0/6-311+G(d) level including zero-point energy (ZPE) corrections, along with their relative energies

(in parentheses). Relative energies are also presented for top 5 lowest-energy isomers at the single-point CCSD(T)/6-311+G(d)//PBE0/6-311+G(d), B3LYP/6-311+G(d) (in square brackets, with ZPE corrections), and single-point CCSD(T)/6-311+G(d)//B3LYP/6-311+G(d) (in curly brackets) levels of theory. All energies are shown in kcal mol<sup>-1</sup>.

- Figure S2.** Displacement vectors of the vibrational modes of (a) GM and (b) TS structures of the Al<sub>2</sub>B<sub>8</sub> cluster.
- Figure S3.** Canonical molecular orbitals (CMOs) of the TS structure of Al<sub>2</sub>B<sub>8</sub> cluster. (a) Two CMOs for lone pairs of two Al atoms. (b) Seven CMOs for Lewis-type B–B  $\sigma$  single bonds along peripheral B ring. (c) Three delocalized  $\pi$  CMOs. (d) Three delocalized  $\sigma$  CMOs.
- Figure S4.** AdNDP bonding scheme for TS C<sub>2v</sub> (<sup>1</sup>A<sub>1</sub>) Al<sub>2</sub>B<sub>8</sub> cluster. Occupation numbers (ONs) are shown.

## Supplementary Information – Part II

**A short movie** extracted from the BOMD simulation for Al<sub>2</sub>B<sub>8</sub> cluster. The simulation has been performed at near room temperature (300 K) for 50 ps. The movie roughly covers a time span of 10 ps.

**Table S1.** Cartesian coordinates for optimized global-minimum (GM) and transition-state (TS) structures of Al<sub>2</sub>B<sub>8</sub> cluster at the PBE0/6-311+G(d) level.

GM (C<sub>2v</sub>, <sup>1</sup>A<sub>1</sub>)

|    |            |            |            |
|----|------------|------------|------------|
| B  | 0.00000000 | 0.77365900 | -1.3115190 |
| B  | 0.00000000 | -0.7736590 | -1.3115190 |
| B  | 0.00000000 | -1.7351360 | -0.1015070 |
| B  | 0.00000000 | -1.3984640 | 1.41124100 |
| B  | 0.00000000 | 0.00000000 | 2.09071600 |
| B  | 0.00000000 | 1.39846400 | 1.41124100 |
| B  | 0.00000000 | 1.73513600 | -0.1015070 |
| B  | 0.00000000 | 0.00000000 | 0.35217600 |
| Al | 2.27614600 | 0.00000000 | -0.4691000 |
| Al | -2.2761460 | 0.00000000 | -0.4691000 |

TS (C<sub>2v</sub>, <sup>1</sup>A<sub>1</sub>)

|    |            |            |            |
|----|------------|------------|------------|
| B  | 0.00000000 | 1.39054600 | 0.81527500 |
| B  | 0.00000000 | 0.00000000 | 1.49187400 |
| B  | 0.00000000 | -1.3905460 | 0.81527500 |
| B  | 0.00000000 | -1.7393120 | -0.6917170 |
| B  | 0.00000000 | -0.7779250 | -1.9107880 |
| B  | 0.00000000 | 0.77792500 | -1.9107880 |
| B  | 0.00000000 | 1.73931200 | -0.6917170 |
| B  | 0.00000000 | 0.00000000 | -0.3515560 |
| Al | -2.2763240 | 0.00000000 | 0.46810400 |
| Al | 2.27632400 | 0.00000000 | 0.46810400 |

**Table S2.** Orbital composition analysis for occupied canonical molecular orbitals (CMOs) of GM  $C_{2v}$  ( $^1A_1$ )  $Al_2B_8$  cluster. Main components are highlighted in **bold**.

| Subsystem             | CMO                                                                                            | $B_8$ (%)   |             | $Al_2$ (%) |     |
|-----------------------|------------------------------------------------------------------------------------------------|-------------|-------------|------------|-----|
|                       |                                                                                                | s           | p           | s          | p   |
| B–B<br>2c-2e $\sigma$ | 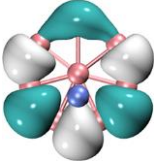<br>HOMO-6    | 7.5         | <b>91.3</b> | 0.0        | 0.0 |
|                       | <br>HOMO-7    | 7.7         | <b>90.7</b> | 0.0        | 0.0 |
|                       | <br>HOMO-9   | <b>34.6</b> | <b>63.3</b> | 0.0        | 0.2 |
|                       | <br>HOMO-10 | <b>34.3</b> | <b>63.3</b> | 0.3        | 0.2 |
|                       | <br>HOMO-12 | <b>33.8</b> | <b>62.9</b> | 0.0        | 0.1 |
|                       | <br>HOMO-13 | <b>33.8</b> | <b>61.9</b> | 0.4        | 0.2 |
|                       | <br>HOMO-14 | <b>60.5</b> | <b>31.9</b> | 0.8        | 0.9 |

|                       |                                                                                                |             |             |             |      |
|-----------------------|------------------------------------------------------------------------------------------------|-------------|-------------|-------------|------|
| two lone pairs        | 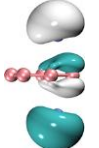<br>HOMO      | 0.0         | 20.2        | <b>63.8</b> | 13.8 |
|                       | <br>HOMO-5    | 9.4         | 25.7        | <b>61.7</b> | 1.0  |
| $6\sigma$ aromaticity | <br>HOMO-2    | <b>17.5</b> | <b>46.0</b> | <b>30.5</b> | 2.9  |
|                       | <br>HOMO-4    | <b>23.5</b> | <b>71.7</b> | 0.0         | 1.7  |
|                       | <br>HOMO-8   | <b>53.4</b> | <b>42.3</b> | 2.2         | 0.6  |
| $6\pi$ aromaticity    | <br>HOMO-1  | 0.0         | <b>90.2</b> | 0.0         | 7.5  |
|                       | <br>HOMO-3  | 0.0         | <b>83.4</b> | 11.3        | 3.7  |
|                       | <br>HOMO-11 | 0.0         | <b>81.9</b> | 14.4        | 0.4  |

**Table S3.** Orbital composition analysis for occupied CMOs of TS Al<sub>2</sub>B<sub>8</sub> cluster. Main components are highlighted in **bold**.

| Subsystem      | CMO                                                                                            | B <sub>8</sub> (%) |             | Al <sub>2</sub> (%) |     |
|----------------|------------------------------------------------------------------------------------------------|--------------------|-------------|---------------------|-----|
|                |                                                                                                | s                  | p           | s                   | p   |
| B–B<br>2c-2e σ | 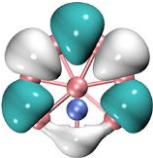<br>HOMO-6    | 7.6                | <b>91.3</b> | 0.0                 | 0.0 |
|                | <br>HOMO-7    | 7.5                | <b>90.8</b> | 0.0                 | 0.0 |
|                | <br>HOMO-9   | <b>34.4</b>        | <b>63.5</b> | 0.0                 | 0.2 |
|                | <br>HOMO-10 | <b>34.5</b>        | <b>63.1</b> | 0.3                 | 0.2 |
|                | <br>HOMO-12 | <b>33.8</b>        | <b>62.9</b> | 0.0                 | 0.1 |
|                | <br>HOMO-13 | <b>33.8</b>        | <b>61.9</b> | 0.4                 | 0.2 |
|                | <br>HOMO-14 | <b>60.5</b>        | <b>31.9</b> | 0.8                 | 0.9 |

|                        |                                                                                                |             |             |             |      |
|------------------------|------------------------------------------------------------------------------------------------|-------------|-------------|-------------|------|
| two lone pairs         | 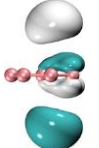<br>HOMO      | 0.0         | 20.1        | <b>63.9</b> | 13.8 |
|                        | <br>HOMO-5    | 9.4         | 25.6        | <b>61.8</b> | 1.0  |
| 6 $\sigma$ aromaticity | <br>HOMO-2    | <b>17.5</b> | <b>46.0</b> | <b>30.5</b> | 2.9  |
|                        | <br>HOMO-4    | <b>23.6</b> | <b>71.7</b> | 0.0         | 1.7  |
|                        | <br>HOMO-8   | <b>53.4</b> | <b>42.2</b> | 2.2         | 0.6  |
| 6 $\pi$ aromaticity    | <br>HOMO-1  | 0.0         | <b>90.1</b> | 0.0         | 7.5  |
|                        | <br>HOMO-3  | 0.0         | <b>83.4</b> | 11.2        | 3.7  |
|                        | <br>HOMO-11 | 0.0         | <b>81.9</b> | 14.3        | 0.4  |

**Figure S1.** Alternative optimized structures for  $\text{Al}_2\text{B}_8$  cluster at the PBE0/6-311+G(d) level including zero-point energy (ZPE) corrections, along with their relative energies (in parentheses). Relative energies are also presented for top 5 lowest-energy isomers at the single-point CCSD(T)/6-311+G(d)//PBE0/6-311+G(d), B3LYP/6-311+G(d) (in square brackets, with ZPE corrections), and single-point CCSD(T)/6-311+G(d)//B3LYP/6-311+G(d) (in curly brackets) levels of theory. All energies are shown in  $\text{kcal mol}^{-1}$ .

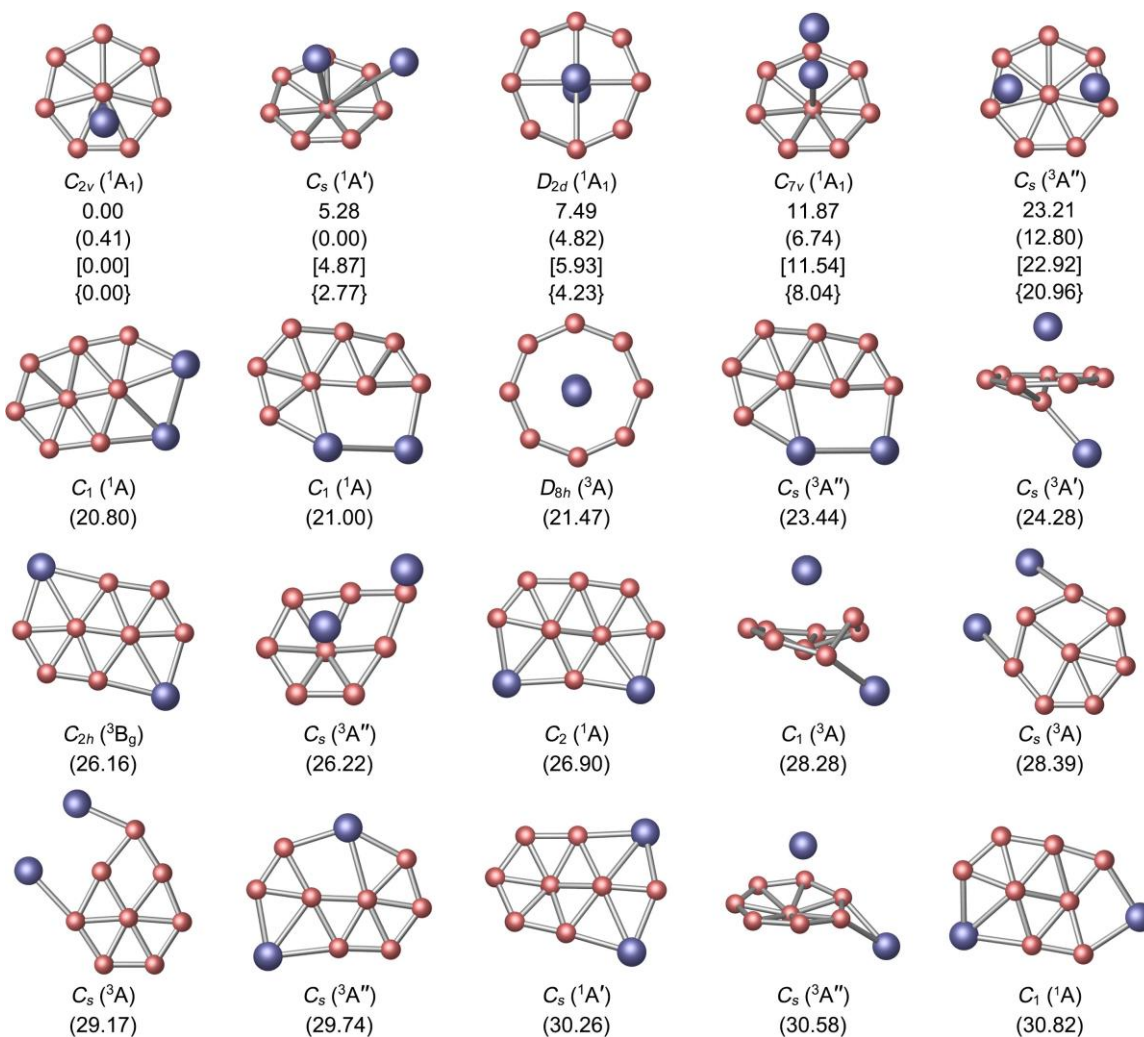



**Figure S2.** Displacement vectors of the vibrational modes of (a) GM and (b) TS structures of the  $\text{Al}_2\text{B}_8$  cluster.

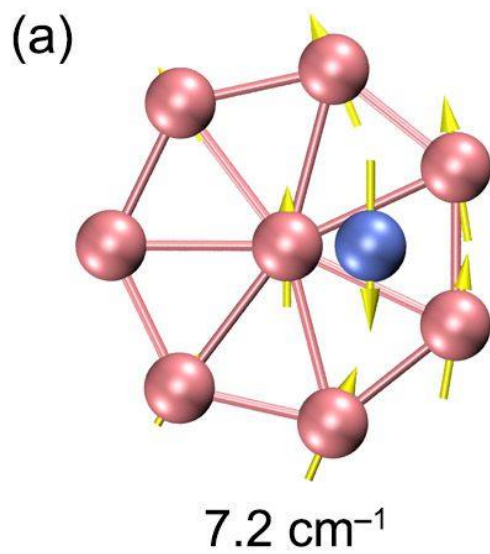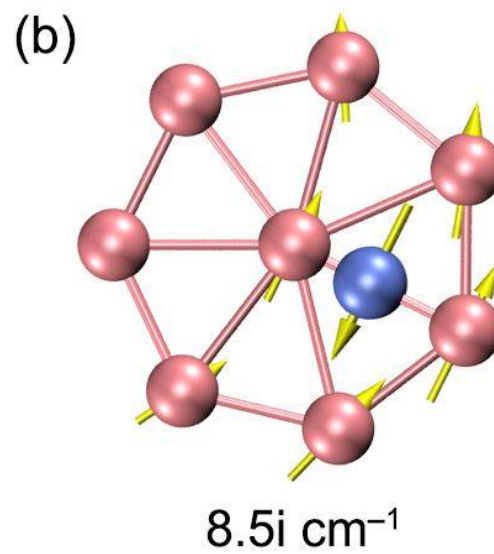

**Figure S3.** Canonical molecular orbitals (CMOs) of the TS structure of  $\text{Al}_2\text{B}_8$  cluster. (a) Two CMOs for lone pairs of two Al atoms. (b) Seven CMOs for Lewis-type B–B  $\sigma$  single bonds along peripheral B ring. (c) Three delocalized  $\pi$  CMOs. (d) Three delocalized  $\sigma$  CMOs.

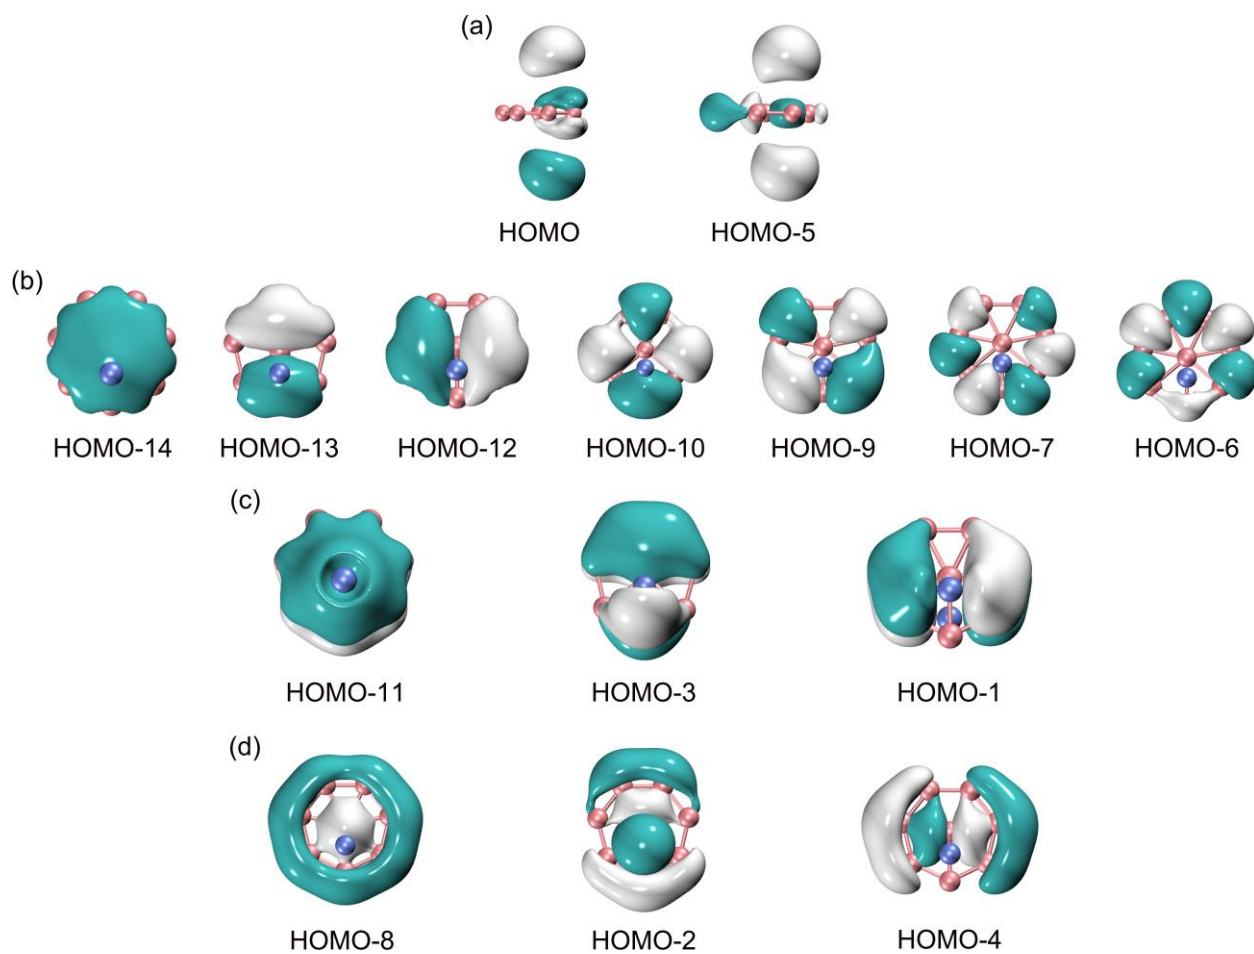

**Figure S4.** AdNDP bonding scheme for TS  $C_{2v}$  ( $^1A_1$ )  $Al_2B_8$  cluster. Occupation numbers (ONs) are shown.

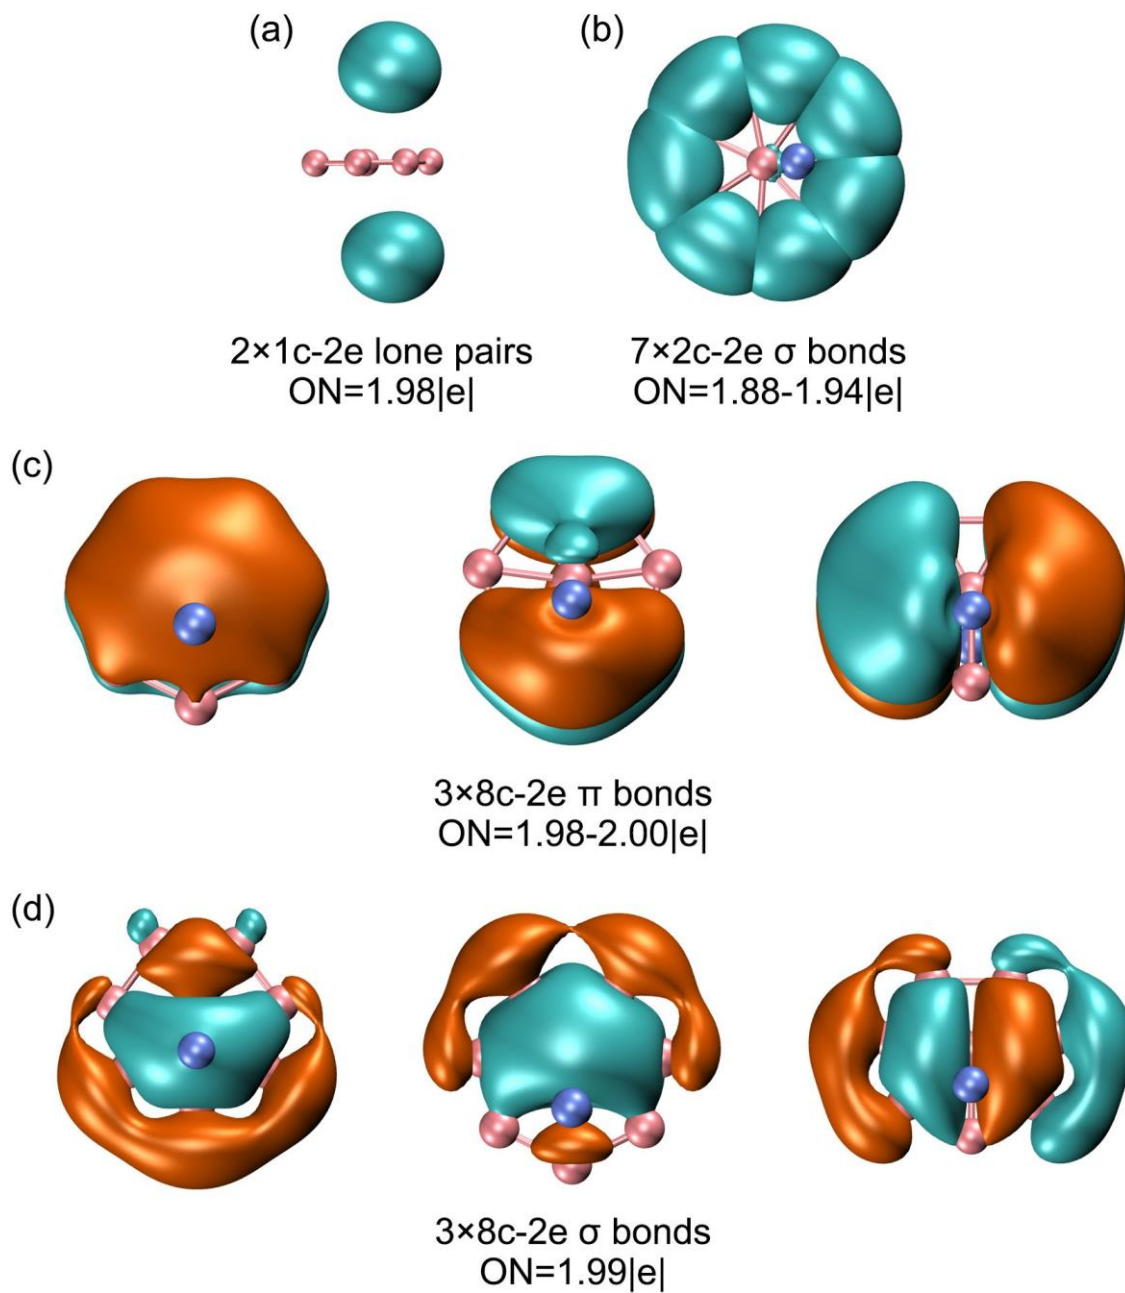

Supplement: d2ra07268h1.pdf [file d2ra07268h1.pdf]
